# Supplementary material for: Restoring a Degraded Riparian Forested Buffer While Balancing Phosphorus Remediation, Biodiversity, and Indigenous Land Access
Source: MDPI journal article supplement (doi:10.3390/su16083366), 2024-04-17
Supplement: s1 [file s1]

## Supplemental Materials

**Table S1.** Multi-functional view of planted and reemerging plant species in the restored plots of the myco-phytoremediation pilot at Shelburne Farms. \*Carol McGranaghan, from her childhood, family, and grandmothers. P is for planted and M is for Migrated species present. Abenaki use of the plants: m, medicinal; e, edible; a, artisanal; c, ceremonial; u, utilitarian.

| Common Name       | Scientific Name             | Planted Or Migrated | Relevance to Abenaki* | Pollinators                                                                                               |
|-------------------|-----------------------------|---------------------|-----------------------|-----------------------------------------------------------------------------------------------------------|
| American Elm      | <i>Ulmus americana</i> ,    | P                   | a, m *                | Birds, Mourning Cloak, Columbia Silk moth, Question Mark, Painted Lady, Comma Butterfly                   |
| Basswood          | <i>Tilia americana</i>      | P                   | e, a, u *             | Native & Honeybees, birds                                                                                 |
| Bitternut Hickory | <i>Carya cordiformis</i>    | P                   | u *                   | Luna, funeral dagger, giant regal, Birds, Butterflies                                                     |
| Black Ash         | <i>Fraxinus nigra</i>       | M                   | a, c, u *             | Birds                                                                                                     |
| Black Willow      | <i>Salix nigra</i>          | P                   | m *                   | Songbirds, waterfowl, Mourning Red Spotted Purple, Tiger Swallowtail                                      |
| Elderberry        | <i>Sambucus Canadensis</i>  | P                   | m *                   | Native, bumble and Honeybees, birds, butterflies, Titan Sphinx, Hydrangea Sphinx                          |
| Maple Seedling    | <i>Acer sp.</i>             | M                   | e, m *                | Native bees, Honeybees, moths, butterflies,                                                               |
| Meadow Willow     | <i>Salix petiolaris</i>     | P                   | a *                   | Native bees, bumblebees, honeybees, Mourning Cloak, Viceroy                                               |
| Oak seedling      | <i>Quercus spp.</i>         | M                   | a, e *                |                                                                                                           |
| Red Maple         | <i>Acer rubrum</i>          | P                   | e, m *                | Native & honey bees, Cecropia moths, other moth larvae, birds                                             |
| Shagbark Hickory  | <i>Carya ovata</i>          | P                   | e, a *                | Insectivorous birds                                                                                       |
| Silver Maple      | <i>Acer saccharinum</i>     | P                   | e, m *                | Birds, Cecropia moth                                                                                      |
| Speckled Alder    | <i>Alnus incana</i>         | P                   | m, c *                | Songbirds, waterbirds, mammals                                                                            |
| Sugar Maple Tree  | <i>Acer saccharum</i>       | M                   | e, m *                | Birds, Cecropia moth                                                                                      |
| Swamp White Oak   | <i>Quercus bicolor</i> ,    | P                   | e *                   | Songbirds, ground birds, water birds, mammals                                                             |
| White Ash         | <i>Polygonatum biflorum</i> | M                   | m *                   | Canada sphinx, Eastern Tiger Swallowtail, Hickory Hairstreak, Mourning Cloak, Viceroy, Birds, Butterflies |

|                       |                                  |   |              |                                                                                    |
|-----------------------|----------------------------------|---|--------------|------------------------------------------------------------------------------------|
| Willow                | <i>Salix sp.</i>                 | P | m *          | Native bees, flies                                                                 |
| Arrowwood             | <i>Viburnum dentatum</i>         | P | a, u *       | Native bees, bumblebees, birds, butterflies, Spring Azure                          |
| Buckthorn             | <i>Frangula alnus</i>            | M | m *          | Bees, wasps, flies, beetles                                                        |
| Buttonbush            | <i>Cephalanthus occidentalis</i> | P | m            | Native bumblebees, honey bees, birds, butterflies, Titan, Sphinx, Hydrangea Sphinx |
| Common Buckthorn      | <i>Rhamnus cathartica</i>        | M | m            | Bees, Flies                                                                        |
| Guelder-rose          | <i>Viburnum opulus</i>           | M | m            | Native bees, bumblebees                                                            |
| Honeysuckle           | <i>Lonicera sp.</i>              | M | e, m *       | Bumblebees, butterflies, hummingbirds                                              |
| Multiflora rose       | <i>Rosa multiflora</i>           | M | e, m *       | Halictid bees, bumblebees, honeybees, Syrphid flies, Beetles                       |
| Nanny Berry           | <i>Viburnum lentago</i>          | P | e, c, m *    | Birds, butterflies, Spring Azure                                                   |
| Red Osier Dogwood     | <i>Cornus sericea</i>            | P | m, a *       | Waterfowl, marsh & shore birds, butterflies, Spring Azure                          |
| Rubus species         | <i>Rubus sp.</i>                 | M | e, m         | Native bees, Honeybees, bumblebees                                                 |
| Staghorn Sumac        | <i>Rhus typhina</i>              | M | e, m *       | Native bees, honeybees, birds                                                      |
| Winterberry           | <i>Ilex verticillata</i>         | P | m *          | Honeybees, birds, butterflies, Elf larvae host                                     |
| Bedstraw              | <i>Galium boreale</i>            | M | e, m *       | Bees, flies, beetles, ants, butterflies, moths                                     |
| Bindweed              | <i>Calystegia sp.</i>            | M | m            | Bees, moths                                                                        |
| Bitter Lettuce        | <i>Lactuca virosa</i>            | M | m *          | Bumblebees                                                                         |
| Blue Flag Iris        | <i>Iris versicolor</i>           | P | m *          | Birds, hummingbirds                                                                |
| Boneset               | <i>Eupatorium perfoliatum</i>    | P | m *          | Native bees, birds, butterflies                                                    |
| Clammy Ground Cherry  | <i>Physalis heterophylla</i>     | M | e, m *       | Bumblebees                                                                         |
| Cow Vetch             | <i>Vicia cracca</i>              | M | e, m         | Bumblebees, Halictine bees, Syrphid flies                                          |
| Curly Dock            | <i>Rumex crispus</i>             | M | e, m         | Wind pollinated                                                                    |
| Dandelion             | <i>Taraxacum officinale</i>      | M | e, m         | Bees, butterflies                                                                  |
| Enchanters Nightshade | <i>Circaea canadensis</i>        | M | m *          | Sweat bees, carpenter bees                                                         |
| Evening Primrose      | <i>Oenothera biennis</i>         | M | e, m         | Birds, hummingbirds                                                                |
| Field Horsetail       | <i>Equisetum arvense</i>         | M | a, e, m, u * | Does not produce pollen                                                            |
| Fringed Willowherb    | <i>Epilobium ciliatum</i>        | M | m *          | Butterflies, moths, hummingbirds                                                   |
| Gentian sp.           | <i>Gentiana sp.</i>              | M | m            | Bees                                                                               |
| Goldenrod             | <i>Solidago sp.</i>              | M | m *          | Bees, butterflies, wasps flies, moth, butterfly                                    |

|                        |                                     |   |           |                                                                        |
|------------------------|-------------------------------------|---|-----------|------------------------------------------------------------------------|
| Grass                  | <i>Poaceae sp.</i>                  | P | a, c, u * | Birds                                                                  |
| Greater Burdock        | <i>Arctium lappa</i>                | M | e, m      | Bumblebees, honeybees, miner bees, leaf cutting Bees                   |
| Green Bull Grass       | <i>Scirpus atrovirens</i>           | P | u *       | Birds                                                                  |
| Heart leaved Aster     | <i>Symphyotrichum cordifolium</i>   | M | Unknown   | Native bees, butterflies                                               |
| Hoary Alyssum          | <i>Berteroa incana</i>              | M | m         | Syrphid and other flies, wild bees, wasps                              |
| Jewelweed              | <i>Impatiens capensis</i>           | M | e, m *    | Bumblebees, birds, butterflies, hummingbirds                           |
| Joe Pye Weed           | <i>Eutrochium purpureum</i>         | P | m *       | Native bees, birds, butterflies                                        |
| Lady's Thumb           | <i>Persicaria maculosa</i>          | M | m *       | Halictid bees wasps, Syrphid flies, bee flies, bumblebees, butterflies |
| Lambs Quarter          | <i>Chenopodium album</i>            | M | e, m      | Birds                                                                  |
| Long hair Sedge        | <i>Carex camosa</i>                 | P | Unknown   | Nesting for insects and birds                                          |
| Meadow Buttercup       | <i>Ranunculus acris</i>             | M | m         | Bees, flies, beetles, moths, butterflies                               |
| Milkweed               | <i>Asclepias sp.</i>                | M | e, m, u * | Bumble bees, butterflies                                               |
| moss                   | ?                                   | M | u *       | Does not produce pollen                                                |
| Mugwort                | <i>Artemisia vulgaris</i>           | M | m         | Bees, butterflies                                                      |
| Mustard family         | <i>Brassica olerace</i>             | M | e, m      | Honeybees, solitary bees, hoverflies                                   |
| New England Aster      | <i>Symphyotrichum novae-angliae</i> | P | m *       | Birds, butterflies                                                     |
| Night Shade            | <i>Solanum dulcamara</i>            | M | m *       | Native bees, bumblebees                                                |
| Nodding Burr Marigolds | <i>Bidens ceruna</i>                | M | m *       | Bees, wasps, butterflies, moths                                        |
| Plantain               | <i>Plantago major</i>               | M | m *       | Honey and bumble bees                                                  |
| Poison Ivy             | <i>Toxicodendron radicans</i>       | M | m, u *    | Ants, wasps, beetles, flies                                            |
| Rhomboid Mercury       | <i>Acalypha rhomboidea</i>          | M | m *       | Little value to pollinators                                            |
| Sedges                 | <i>Cyperaceae spp.</i>              | M | u *       | Butterflies, native bees                                               |
| Solomon Seal           | <i>Polygonatum biflorum</i>         | M | m *       | Bumble bees, Digger bees, Ruby throated Hummingbirds                   |
| Sorrel                 | <i>Rumex acetosa</i>                | M | m         | Wind pollinated                                                        |
| Sow Thistle            | <i>Sonchus arvensis</i>             | M | e, m      | Bees, flies, blister beetles                                           |
| Spear Saltbush         | <i>Atriplex patula</i>              | M | e *       | Wind, self fertilizing                                                 |
| St. Johnswort          | <i>Hypericum perforatum</i>         | M | m *       | Bumblebees, Honeybees                                                  |
| Strawberry             | <i>Fragaria sp.</i>                 | M | e, m *    | Native bees, butterflies, Gray Hairstreak                              |
| Switch Grass           | <i>Panicum virgatum</i>             | P | u *       | Birds, butterflies, Delaware & Dotted Skipper                          |
| Thistle                | <i>Cirsium sp.</i>                  | M | m *       | Native Bees, Bumblebees, Butterflies, Moths                            |

|                           |                                    |   |         |                                                                                                     |
|---------------------------|------------------------------------|---|---------|-----------------------------------------------------------------------------------------------------|
| Turtlehead                | <i>Chelone glabra</i>              | P | m *     | Hummingbirds, butterflies,<br>Baltimore Checkerspot                                                 |
| Velvet Leaf               | <i>Abutilon theophrasti</i>        | M | e, u    | Self pollinating                                                                                    |
| Violets                   | <i>Viola sp.</i>                   | M | e, m *  | Birds                                                                                               |
| Virginia Copper leaf      | <i>Acalypha virginica</i>          | M | m *     | Wind pollinated                                                                                     |
| Virginia Creeper          | <i>Parthenocissus quinquefolia</i> | M | m *     | Virginia Creeper sphinx,<br>Abbot's sphinx moth,<br>Pandora sphinx moth, White<br>lined sphinx moth |
| White Avens               | <i>Geum canadense</i>              | M | e, m *  | Butterflies                                                                                         |
| White Vervain             | <i>Verbena urticifolia</i>         | M | e, m *  | Bumblebees, Wasps,<br>Butterflies                                                                   |
| White wood Aster          | <i>Eurybia divaricata</i>          | M | e, m *  | Butterflies                                                                                         |
| Wild Carrot               | <i>Daucus pusillus</i>             | M | e, m    | Bees, wasps, flies, beetles                                                                         |
| Wild Ginger               | <i>Asarum canadense</i>            | P | m *     | Butterflies, Pipeline<br>Swallowtail                                                                |
| Wild Grape                | <i>Vitis labrusca</i>              | M | e *     | Bees, bumblebees, birds                                                                             |
| Wood Sorrel               | <i>Oxalis stricta</i>              | M | e *     | Bees, ants, butterflies                                                                             |
| Virginia Wild Rye         | <i>Elymus virginicus</i>           | P | e *     | Birds, Butterflies, Branded<br>Skippers and Satyr<br><br>Larval Hosts                               |
| Red Fescue                | <i>Festuca rubra</i>               | P | Unknown | Birds                                                                                               |
| Fox Sedge                 | <i>Carex vulpinoidea</i>           | P | u *     | Birds                                                                                               |
| Wool Grass                | <i>Scirpus cyperinus</i>           | P | u *     | Birds, Dion Skipper                                                                                 |
| Green Bull grass          | <i>Scirpus atrovirens</i>          | P | u *     | Birds, waterfowl, songbirds,<br>shorebirds                                                          |
| Nodding Bur-Marigold      | <i>Bidens cernua</i>               | P | m *     | Birds, native bees                                                                                  |
| Soft Rush                 | <i>Juncus effusus</i>              | P | u *     | Birds                                                                                               |
| Sensitive Fern            | <i>Onoclea sensibilis</i>          | P | m *     | Birds, salamanders, frogs                                                                           |
| Blue Vervain              | <i>Verbena hastata</i>             | P | m *     | Native Bees                                                                                         |
| <b>Fungi</b>              |                                    |   |         |                                                                                                     |
| Turkey Tail               | <i>Trametes versicolor</i>         | M | m *     | Unknown                                                                                             |
| Trembling crust           | <i>Merulius tremellosus</i>        | M | Unknown | Unknown                                                                                             |
| Trametes pubescens        | <i>Trametes pubescens</i>          | M | m       | Unknown                                                                                             |
| Mossy Maze Polyore        | <i>Cerrena unicolor</i>            | M | m *     | Unknown                                                                                             |
| Thin-Walled Maze Polypore | <i>Daedaleopsis confragosa</i>     | M | Unknown | Unknown                                                                                             |
| Common Bonnet             | <i>Mycena galericulata</i>         | M | Unknown | Unknown                                                                                             |
| Dryads Saddle             | <i>Cerioporus squamosus</i>        | M | e, m *  | Unknown                                                                                             |

([1–5]; Moerman, 1998; Rubin and Görres, 2022b; Webmaster, 2023; “Botanical Garden,” 2023; “*Rhamnus cathartica*, *R. davurica*,” 2023)

### Mehlich-3-extractable P

There was a statistically significant difference ( $p < 0.001$ ) in treatment and date over the three years for Mehlich-3-extractable phosphorous. The means of data pooled for the time period were 6.73 (mg/kg) for OIV, 8.99 (mg/kg) for RV, and 6.59 (mg/kg) for RVM.

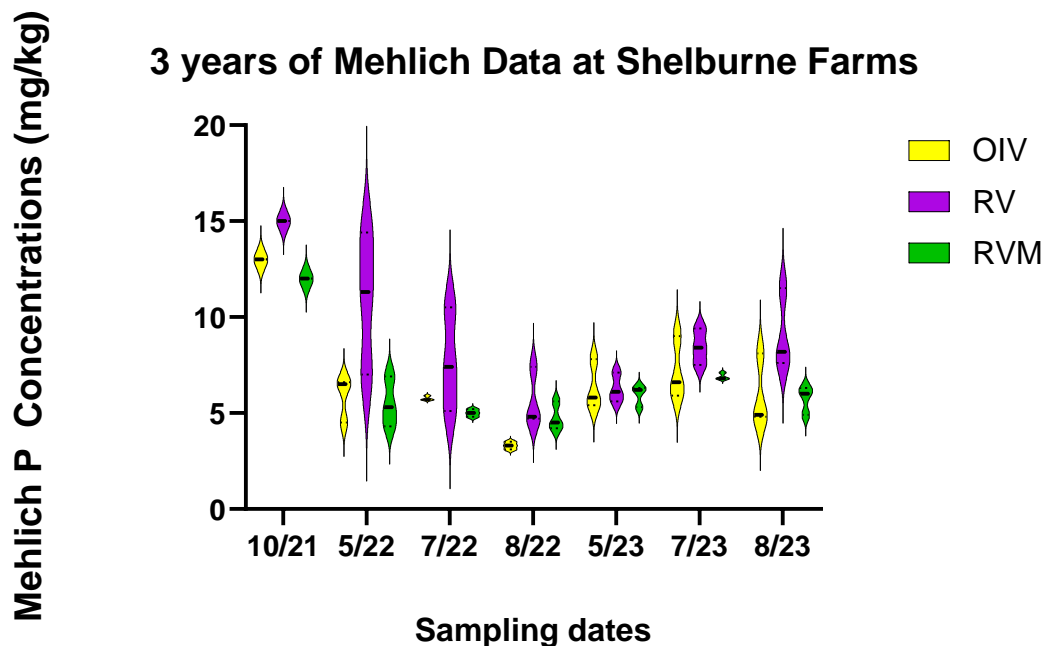

**Figure S1.** Mehlich-3 extractable P concentrations over the three years it was gathered during the four-year study period.

### Water-extractable P (WEP-SRP)

There was statistically significant difference for date ( $p = 0.042$ ) but not for treatment ( $p = 0.115$ ) in SRP concentrations over the last 2 years. The means of data pooled for the study period were 0.136 (mg/L), 0.115 (mg/L), and 0.106 (mg/L) for OIV, RV, and RVM respectively.

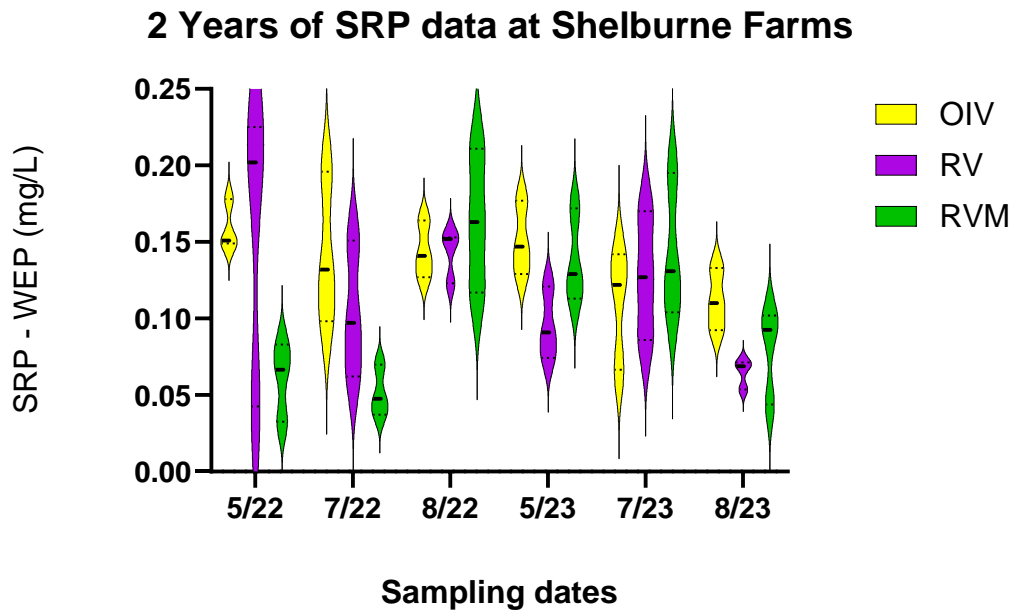

**Figure S2** Water extractable soil phosphate concentrations for the two growing seasons we collected it.

#### Citations

1. Hutchens, A.R. *A Handbook of Native American Herbs: The Pocket Guide to 125 Medicinal Plants and Their Uses*; Shambhala Publications, 1992; ISBN 978-0-8348-2422-5.
2. Moerman, D.E. *Native American Ethnobotany*; Timber Press, 1998;
3. Rubin, J.A.; Görres, J.H. The Effects of Mycorrhizae on Phosphorus Mitigation and Pollinator Habitat Restoration within Riparian Buffers on Unceded Land. *Restor. Ecol.* **2022**, *31*, e13671, doi:10.1111/rec.13671.
4. Webmaster, D.R. (Kingdom) Plants - Montana Field Guide Available online: <https://fieldguide.mt.gov/displayPhyDiv.aspx?Kingdom=Plantae> (accessed on 15 December 2023).
5. *Rhamnus Cathartica*, R. *Davurica* Available online: <https://www.fs.usda.gov/database/feis/plants/shrub/rhaspp/all.html> (accessed on 15 December 2023).
